# Supplementary material for: The impact of Merowe Dam on Simulium hamedense vector of onchocerciasis in Abu Hamed focus - Northern Sudan
Source: Springer Nature journal article supplement (doi:10.1186/1756-3305-7-168), 2014-01-01

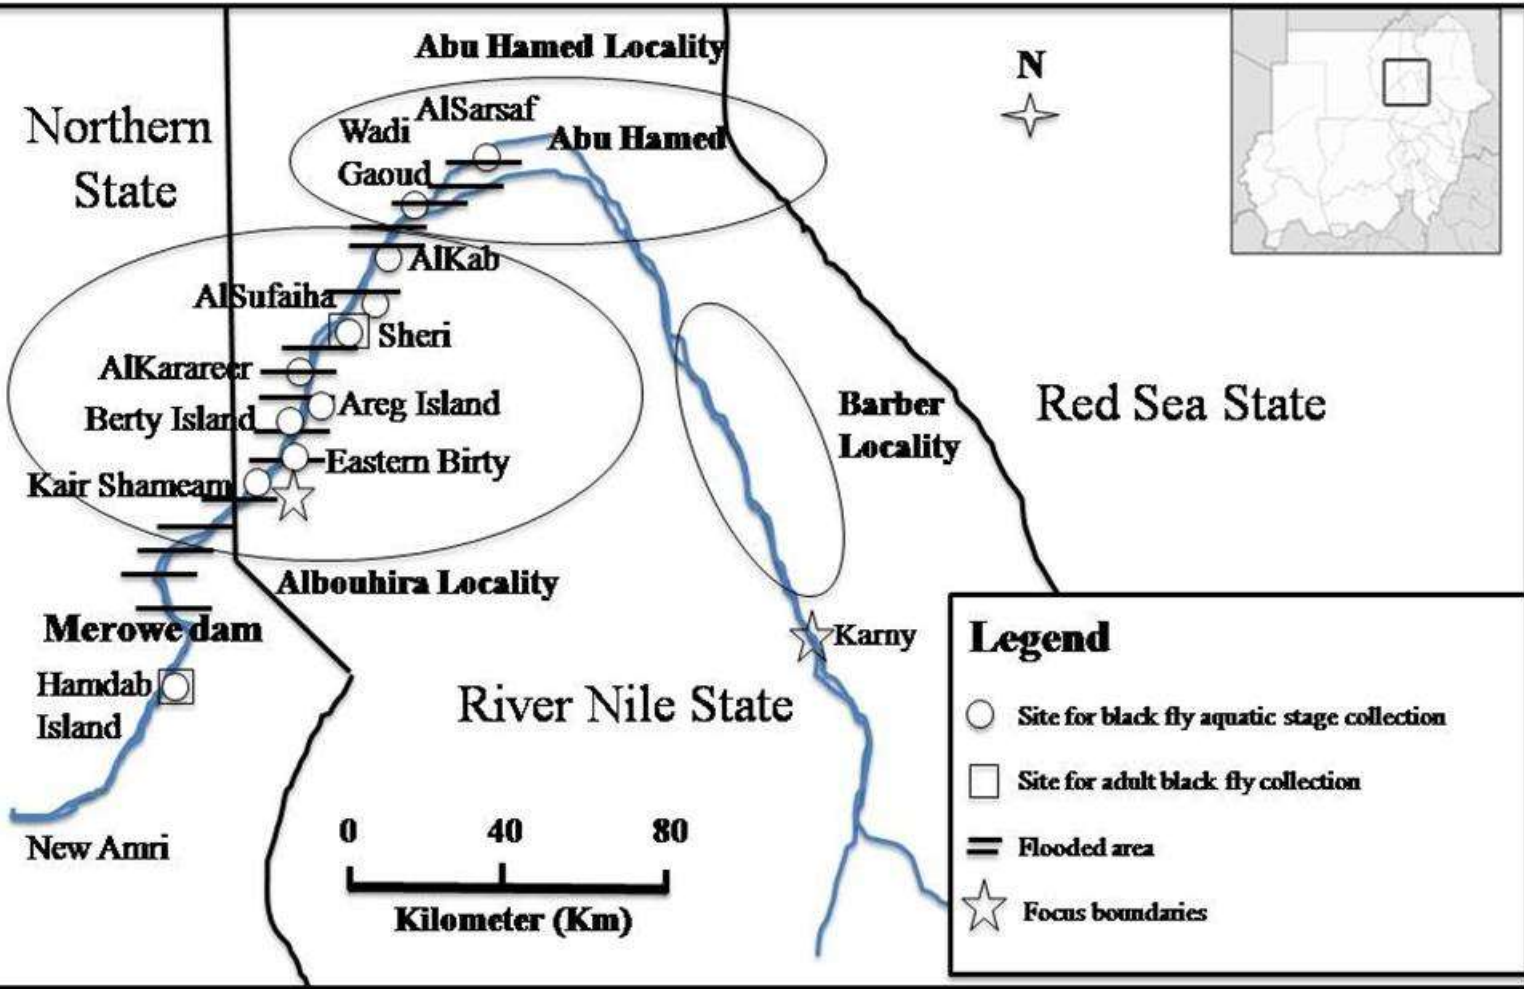

Supplement: 13071_2014_1275_MOESM1_ESM.pdf [file 13071_2014_1275_MOESM1_ESM.pdf]
